# Supplementary material for: Fast and Large Shrinking of Thermoresponsive Hydrogels with Phase-Separated Structures
Source: MDPI journal article supplement (doi:10.3390/gels7010018), 2021-02-16
Supplement: s1 [file s1]

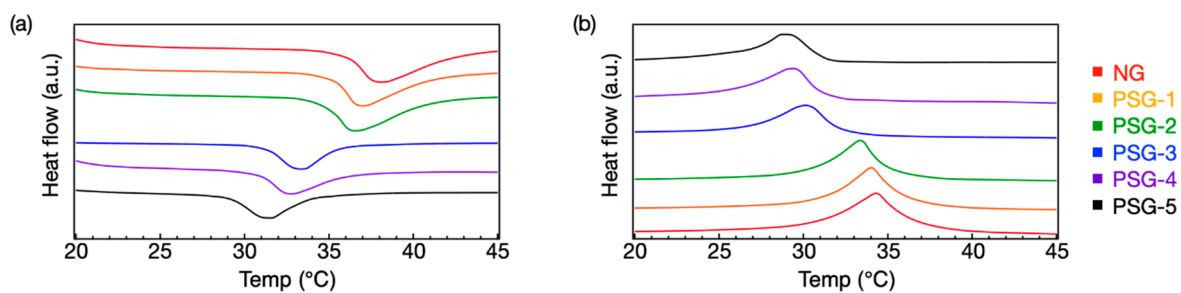

**Figure S1.**

**Phase transition behaviors of the hydrogels.** Differential scanning calorimetry (DSC) traces upon (a) heating and (b) cooling between 20 and 45 °C at a rate of 5.0 °C/min.

### Water uptake of polymer and water content in the hydrogels

The rod type of NG and PSGs was dried in vacuum until its weight was constant ( $W_d$ ). The water uptake of polymer was calculated by the gravity method:

$$\text{Water uptake of polymer} = \frac{W_0 - W_d}{W_d}$$

where  $W_0$  is the initial weight of the equilibrium state at 20 °C.

Also, the water content in NG or PSGs was calculated by the gravity method:

$$\text{Water content in hydrogel} = \frac{W_0 - W_d}{W_0} \times 100\%$$

where  $W_0$  is the initial weight of the equilibrium state at 20 °C.

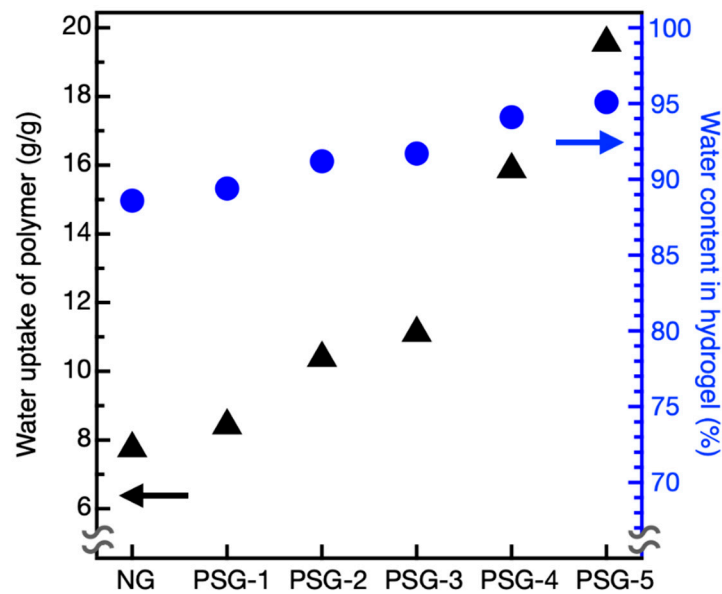

**Figure S2.** Water uptake of polymer and water content of NG and PSGs.

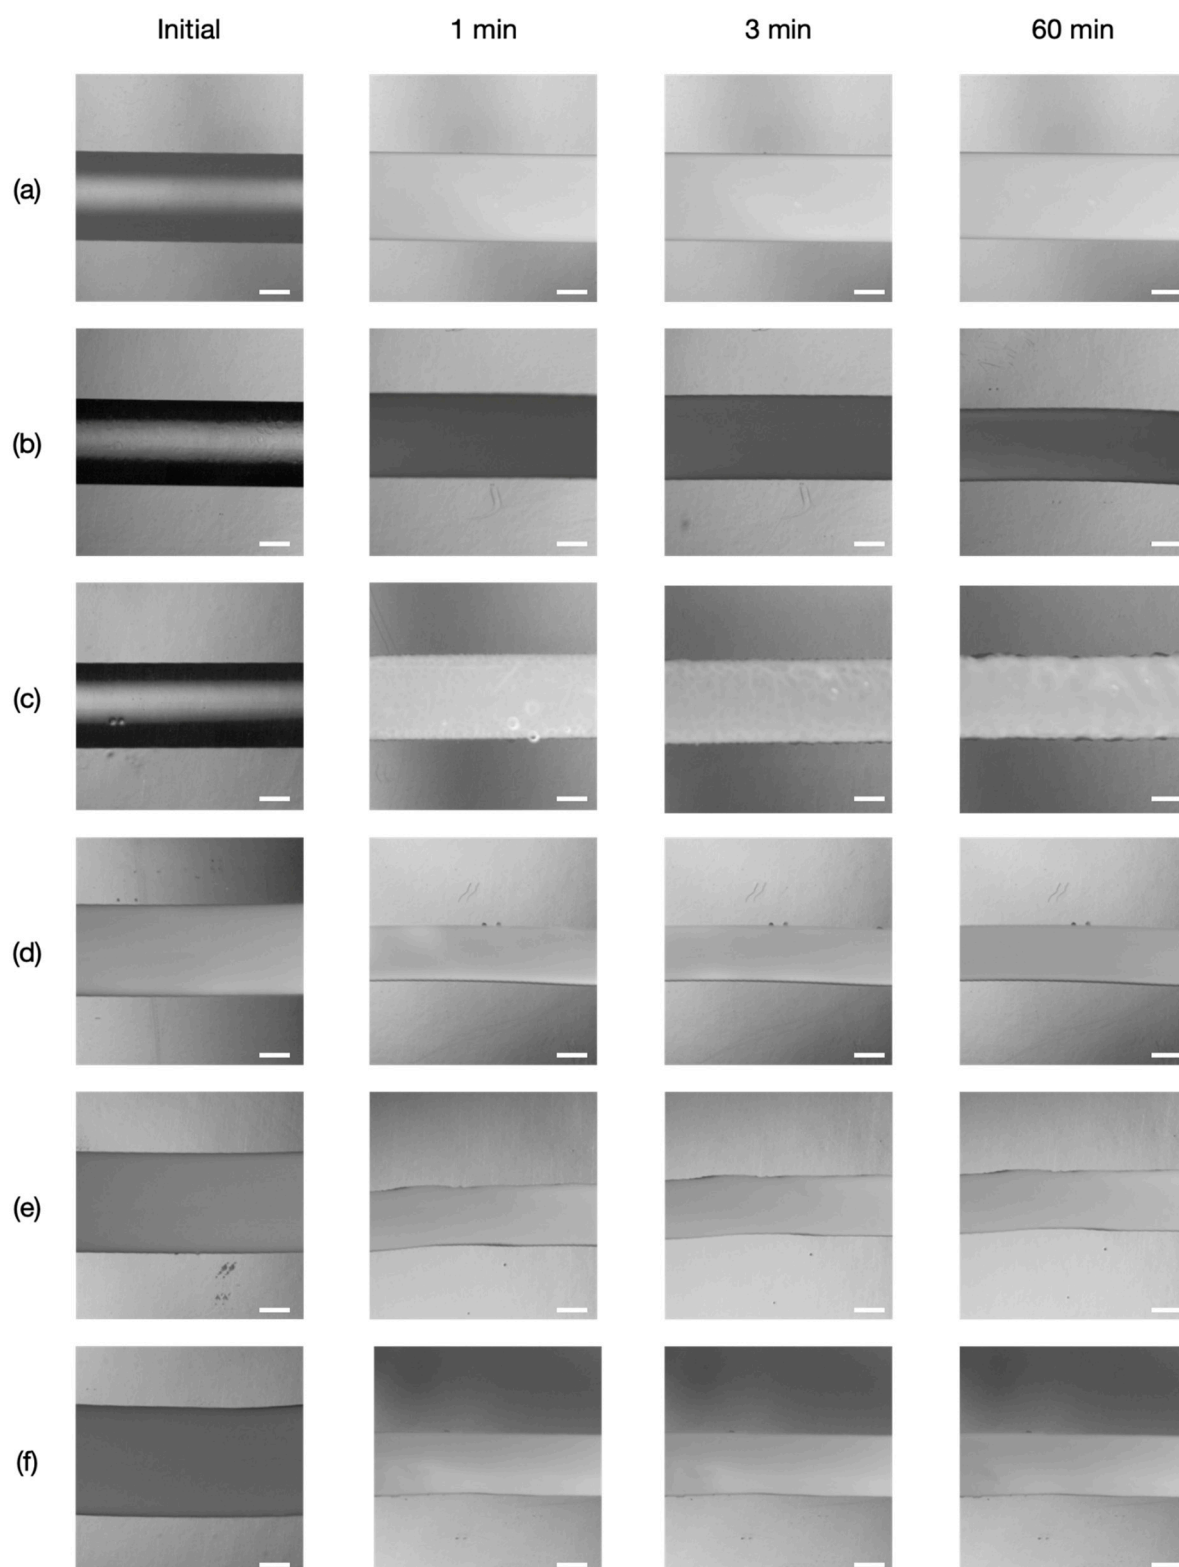

**Figure S3. Shrinking behaviors of NG and PSGs.** Optical images showing the (a) NG, (b) PSG-1, (c) PSG-2, (d) PSG-3, (e) PSG-4 and (f) PSG-5 after the temperature jumping from 20 °C to 45 °C. Scale bar, 1 mm.
